# Supplementary material for: CoSal: A remote sensing and machine learning framework for mapping coastal soil salinity trends around aquaculture in South Asia
Source: Research Square preprint supplement (doi:10.21203/rs.3.rs-6173117/v1), 2025-03-25
Supplement: Supplementary file 1 [file f4816fd9fadde88463b7200c.docx]

**Supplementary 1: Supervised Land Use Land Cover Classification**

**Purpose:** To create a random forest classifier to identify active aquaculture ponds, dry aquaculture ponds, and other land uses on a Landsat Satellite imagery. We use field observations and high-resolution Sentinel 2 imagery for reference data. This supplementary includes the code used, and the accuracy results of the supervised classification.

**Code**: (Google Earth Engine) - 1_LULCClassification_Code.txt

**Hyperparameter tuning:** We use 50 trees based on the following result:


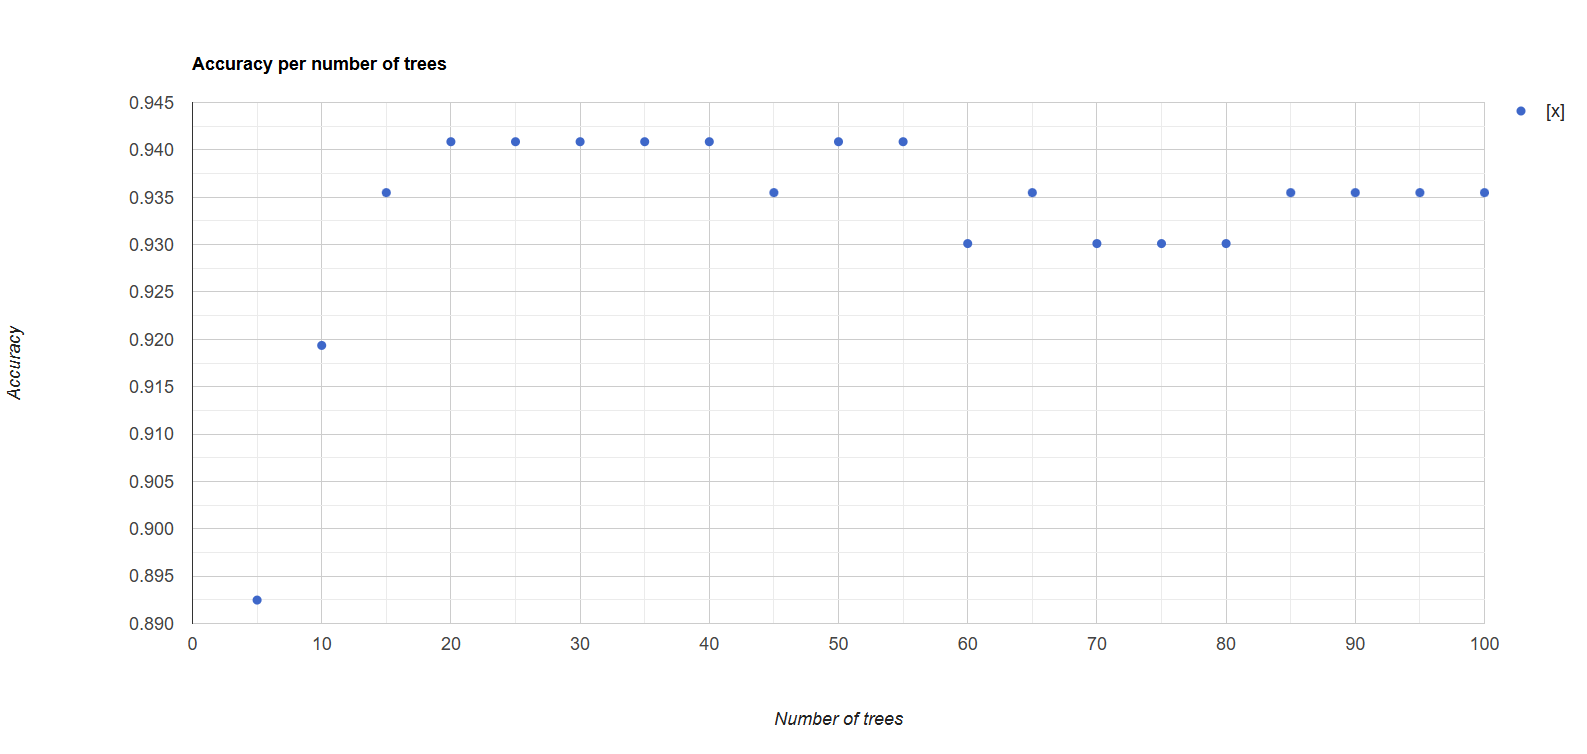


**Final model accuracy results**:

Confusion matrix:

[[75,4,0],[2,41,0],[1,0,44]]

0: [75,4,0]

0: 75

1: 4

2: 0

1: [2,41,0]

0: 2

1: 41

2: 0

2: [1,0,44]

0: 1

1: 0

2: 44

Overall Accuracy:

0.96

Producers Accuracy:

List (3 elements)

0: [0.95]

1: [0.95]

2: [0.98]

Consumers Accuracy:

0: 0.96

1: 0.91

2: 1

Kappa:

0.93

**Comparing accuracy outputs with alternate pixel reducers**

The accuracy results with the 30th percentile (listed in the previous section in more detail) are the best among the various reducers tested, closely followed by the geometric median. For the CoSal-SA model, we have therefore employed the 30th percentile.

| **Accuracy measure** | **Percentile (30)** | **Geometric median** | **Median/Percentile (50)** | **Percentile (70)** |
| --- | --- | --- | --- | --- |
| Overall accuracy | 0.96 | 0.94 | 0.92 | 0.90 |
| Kappa | 0.93 | 0.91 | 0.88 | 0.84 |
| Producers accuracy | 0: [0.95]  1: [0.95]  2: [0.98] | 0: [0.95]  1: [0.93]  2: [0.94] | 0: [0.97]  1: [0.85]  2: [0.90] | 0: [0.95]  1: [0.80]  2: [0.90] |
| Consumers accuracy | 0: [0.96]  1: [0.91]  2: [1] | 0: [0.95]  1: [0.93]  2: [0.94] | 0: [0.92]  1: [0.85]  2: [0.98] | 0: [0.91]  1: [0.86]  2: [0.91] |

**Supplementary 2: Surface Reflectance Parameters and Indices**

**28 Parameters:**

1. 6 Surface Reflectance bands – Blue, Green, Red, NIR, SWIR1, SWIR2
2. 11 Normalized Band Combinations

# Blue and Red: NBR <- (Blue-Red)/(Blue+Red)

# Blue and green: NBG <- (Blue-Green)/(Blue+Green)

# Blue and NIR: NBNIR <- (Blue-NIR)/(Blue+NIR)

# Blue and SWIR1: NBSWIR1 <- (Blue-SWIR1)/(Blue+SWIR1)

# Blue and SWIR2: NBSWIR2 <- (Blue-SWIR2)/(Blue+SWIR2)

# Red and SWIR1: NRSWIR1 <- (Red-SWIR1)/(Red+SWIR1)

# Red and SWIR2: NRSWIR2 <- (Red-SWIR2)/(Red+SWIR2)

# Green and SWIR1: NGSWIR1 <- (Green-SWIR1)/(Green+SWIR1)

# Green and SWIR2: NGSWIR2 <- (Green-SWIR2)/(Green+SWIR2)

# NIR and SWIR1: NNIRSWIR1 <- (NIR-SWIR1)/(NIR+SWIR1)

# NIR and SWIR2: NNIRSWIR2 <- (NIR-SWIR2)/(NIR+SWIR2)

1. 11 Widely used salinity and other indices

# Salinity Index 1 = sqrt(green^2+red^2)

SI1 <- sqrt((Green)^2 + (Red)^2)

# Salinity Index 2 = sqrt(green x red)

SI2 <- sqrt(Green * Red)

# Salinity Index 3 = sqrt(blue x red)

SI3 <- sqrt(Blue * Red)

# salinity index 4 = red x NIR / green

SI4 <- (Red * NIR / Green)

# salinity index 5 = blue/red

SI5 <- (Blue / Red)

# Soil Adjusted Vegetation Index (SAVI) = ((1.5)x NIR) - (red/0.5) + NIR + Red

SAVI <- (1.5 * NIR) - (0.5 * Red) + NIR + Red

# Vegetation Soil Salinity Index (VSSI) = (2 x green) - 5 x (red + NIR)

VSSI <- (2 * Green) - 5 * (Red + NIR)

# NDVI

NDVI <- (Red-Green)/(Red+Green)

# NDWI

NDWI <- (Green-NIR)/(Green+NIR)

# NDSI2 or Normalised Difference Salinity Index 2 as per as per Khan et al 2001 in Nguyen et al 2020)

NDSI2 <- (Red-NIR)/(Red+NIR)

# NDSI as per the Index Database: https://www.indexdatabase.de/db/is.php?sensor_id=168 )

NDSI1 <- (SWIR1-SWIR2)/(SWIR1+SWIR2)

**Correlation matrix**

**Regression model fit results with EC**

| **Table 1:** Regression coefficients of univariate relationships between EC and various parameters starting with the highest explanatory powers | | | | | | | | | | | | |
| --- | --- | --- | --- | --- | --- | --- | --- | --- | --- | --- | --- | --- |
| **Band/Index** | **Fit** | **β₀** | **SE (β₀)** | **β₁** | **SE(β₁)** | **β2** | **SE (β2)** | **R2** | **Adj R2** | **AIC** | **BIC** | **RMSE** |
| **NDWI** | Polynomial (quad) | 1896.20 | 177.98 | 10932.14 | 1631.20 | 4088.29 | 1631.20 | **0.39** | **0.37** | 1486.00 | 1495.80 | 1601.81 |
| **NDSI2** | Polynomial (quad) | 1896.20 | 180.41 | 9731.52 | 1653.45 | 5966.86 | 1653.45 | **0.37** | **0.36** | 1488.30 | 1498.00 | 1623.66 |
| **NDWI** | Linear | 8098.46 | 972.29 | 15322.05 | 2358.71 |  |  | **0.34** | **0.33** | 1490.30 | 1497.60 | 1662.76 |
| **NIR** | Polynomial (quad) | 1896.20 | 191.69 | -9292.76 | 1756.82 | 3923.95 | 1756.82 | **0.29** | **0.27** | 1498.50 | 1508.20 | 1725.16 |
| **NRSWIR2** | Polynomial (quad) | 1896.20 | 192.15 | 6131.74 | 1761.05 | -7933.99 | 1761.05 | **0.29** | **0.27** | 1498.90 | 1508.60 | 1729.32 |
| **NDSI2** | Linear | 5827.36 | 740.85 | 10155.36 | 1847.64 |  |  | **0.27** | **0.26** | 1498.80 | 1506.10 | 1749.32 |
| **NBNIR** | Polynomial (quad) | 1896.20 | 194.29 | 9058.04 | 1780.65 | 3588.26 | 1780.65 | **0.27** | **0.25** | 1500.80 | 1510.5 | 1748.57 |
| **NDWI** | Log Linear | 10.13 | 0.60 | 7.89 | 1.47 |  |  | **0.26** | **0.25** | 1414.50 | 1421.80 | 1.03 |
| **NIR** | Linear | 9751.56 | 1533.38 | -36597.69 | 7085.17 |  |  | **0.25** | **0.24** | 1501.50 | 1508.80 | 1777.50 |
| **NBNIR** | Linear | 9065.56 | 1449.01 | 12148.39 | 2432.33 |  |  | **0.23** | **0.22** | 1502.90 | 1510.20 | 1791.86 |
| **NRSWIR1** | Linear | 7977.23 | 1271.23 | 14762.02 | 3047.83 |  |  | **0.22** | **0.21** | 1504.00 | 1511.30 | 1804.45 |
| **SAVI** | Polynomial (quad) | 1896.20 | 199.41 | -8484.27 | 1827.59 |  |  | **0.23** | **0.21** | 1505.10 | 1514.90 | 1794.65 |
| **NRSWIR1** | Polynomial (quad) | 1896.20 | 199.44 | 8845.69 | 1827.88 |  |  | **0.23** | **0.21** | 1505.20 | 1514.90 | 1794.94 |
| **NGSWIR1** | Polynomial (quad) | 1896.20 | 199.76 | 5523.74 | 1830.79 | -7053.17 | 1830.79 | **0.23** | **0.21** | 1505.40 | 1515.20 | 1797.80 |
| **SAVI** | Linear | 9671.47 | 1704.71 | -13312.60 | 2898.29 |  |  | **0.21** | **0.20** | 1505.90 | 1513.20 | 1824.99 |

**Supplementary 3: LASSO Regression Results**

LASSO regressions are regressions that penalize adding more variables into the model and decrease coefficient values of variables that contribute less to the model. Two LASSO penalized regressions were run in R with the package ‘glmnet’ to reduce dimensionality of predictors. The first regression was used to determine the best lambda value for penalizing adding more predictors. The second regression was used to select predictors to retain in the model.

**Step 1: Initial LASSO regression to determine lambda value**

(1) Code:

cvmodel <- cv.glmnet(x, y, alpha=1, family='binomial')

(2) Cross-validation error plot:


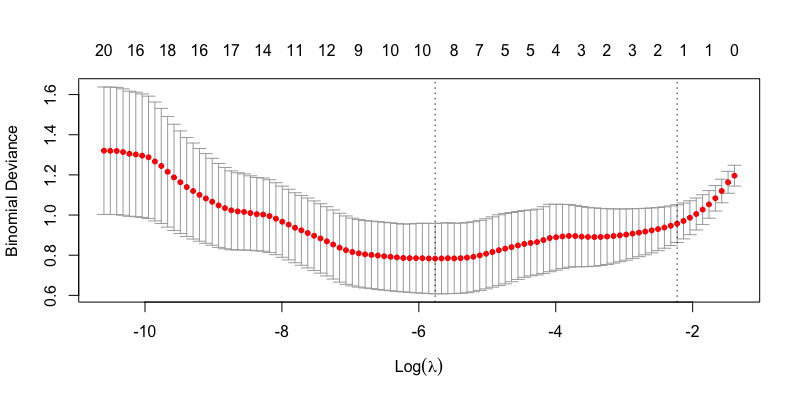


(3) Best lambda value with the lowest error: 0.003145

**Step 2: Final LASSO regression to select variables**

(1) Code:

bestlasso <- glmnet(x, y, alpha=1, lambda=best_lambda, family='binomial')

(2) Coefficients:

| **Table 1:** LASSO regression coefficients | |
| --- | --- |
| **Predictor** | **Coefficient values** |
| (Intercept) | 3.03 |
| Blue_R | . |
| Green_R | 16.79 |
| Red_R | . |
| NIR_R | . |
| SWIR1_R | . |
| SWIR2_R | -31.04 |
| NDVI | . |
| NDWI | 6.82 |
| NDSI1 | 2.52 |
| NDSI2 | . |
| SI1 | . |
| SI2 | . |
| SI3 | . |
| SI4 | . |
| SI5 | . |
| SAVI | . |
| VSSI | -0.10 |
| NBR | . |
| NBG | . |
| NBNIR | 12.35 |
| NBSWIR1 | . |
| NBSWIR2 | -14.16 |
| NRSWIR1 | -3.81 |
| NRSWIR2 | . |
| NGSWIR1 | -5.63 |
| NGSWIR2 | . |
| NNIRSWIR1 | -0.66 |
| NNIRSWIR2 | . |

(3) Retained predictors (with non-zero coefficient values): Green_R, SWIR2_R, NDWI, NDSI1, VSSI, NBSWIR, NBSWIR2, NRSWIR1, NGSWIR1, NNIRSWIR1.

**Supplementary 4: Model validation metrics**

For each model as they use a different subset of data—training, and internal and external testing data sets—we calculated the confusion matrix of true positives (TP), true negatives (TN), false positives (FP), and false negatives (FN), and derived the four metrics to evaluate the model comprehensively:

1. Accuracy = correct classifications / total classifications = (TP + TN)/(TP+TN+FP+FN)

Accuracy involves all four components of the confusion matrix, and usually serves as a coarse measure of overall model quality. In case of imbalanced data, such as ours where there are fewer high salinity points (30 out of 106) than there are for lower salinity (70 out of 106), there is a possibility of getting a relatively high accuracy even if all the high salinity points are incorrectly classified as low (accuracy would still be 70% because TN=70 even when FN=30). We, therefore, also consider the following three metrics in tandem.

1. Precision = correctly classified positives / all classified as positive = TP / (TP+FP)

Precision improves when false positives decrease, that is, high saline data is not classified as low.

1. Recall = correctly classified positives / all actual positives = TP / (TP+FN)

Recall, or sensitivity or true positive rate, improves when false negatives reduce (that is fewer low saline points are classified as high).

1. F1-score = 2 * (precision * recall) / (precision + recall)

F1 score is the harmonic mean of precision and recall, and higher score suggests a more balanced model.

**Supplementary 5: Band Mean-variance normalization comparisons**

We normalized Landsat 5 bands using Landsat 8 (2024) composite as a reference. The following are reflectance distributions of original Landsat 5 composite, matched-normalized band reflectance, and the reference Landsat 8 histogram.

| **1995** | | |
| --- | --- | --- |
| **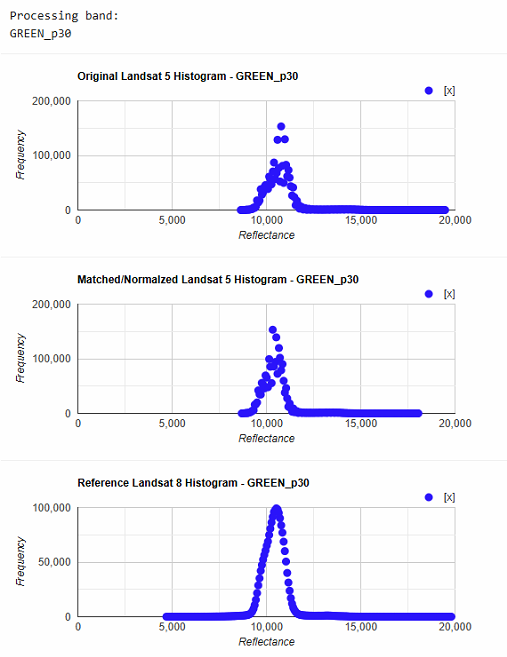** | **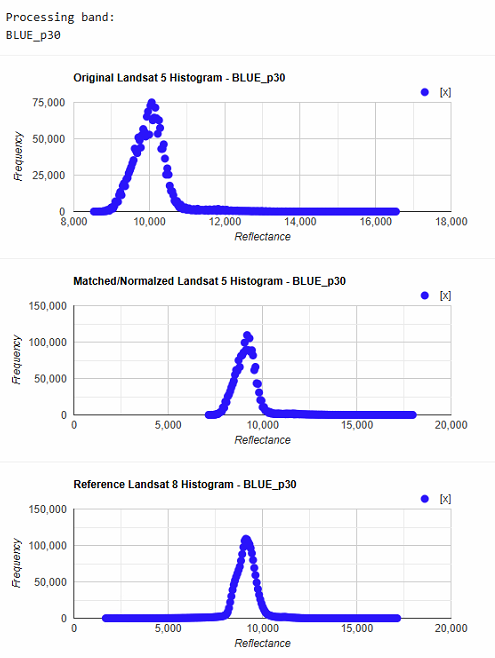** | **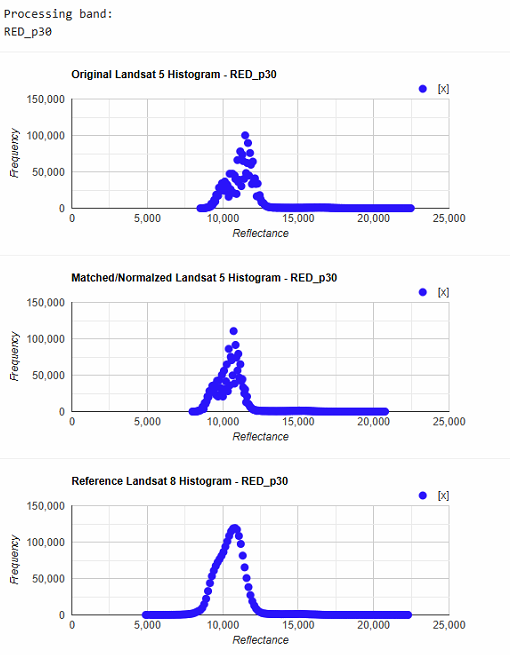** |
| **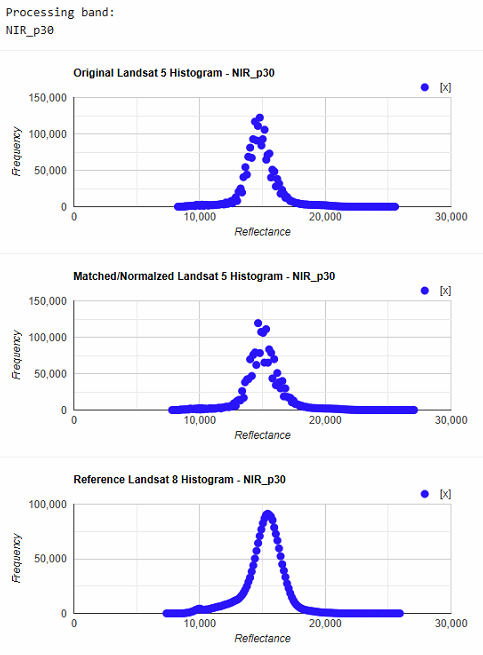** | **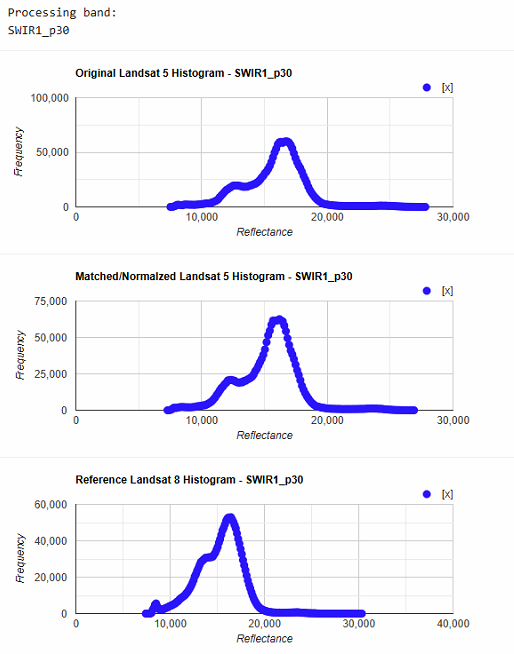** | **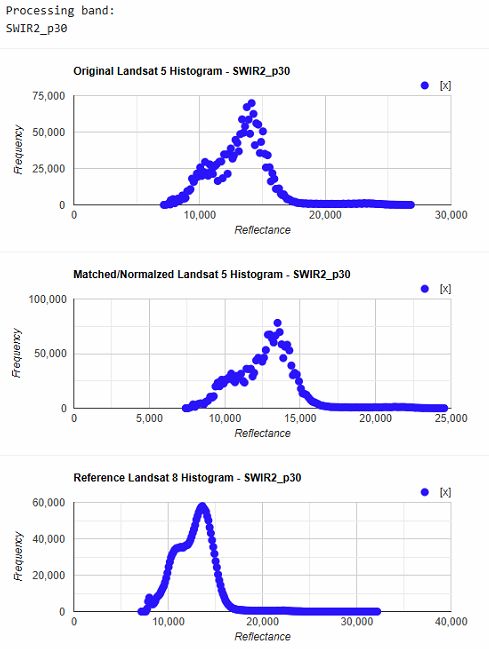** |

| **2001** | | |
| --- | --- | --- |
| **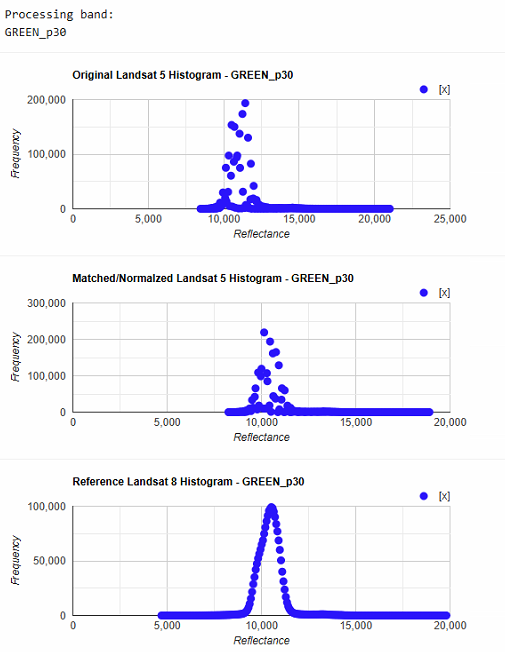** | **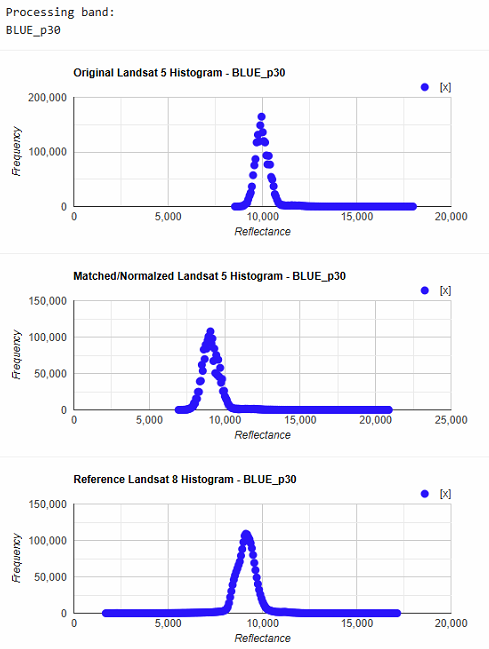** | **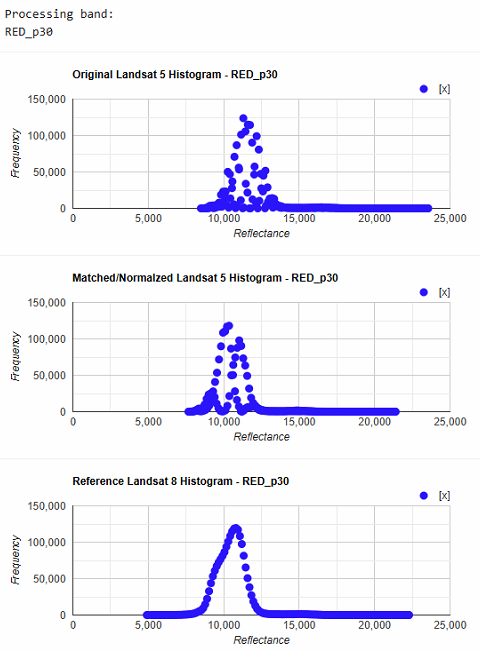** |
| **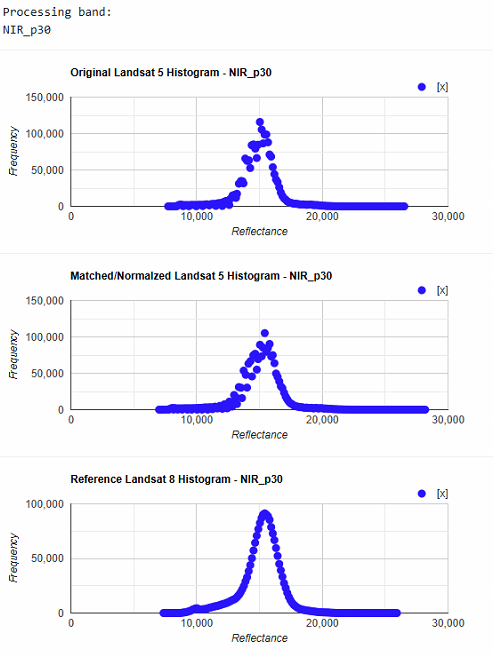** | **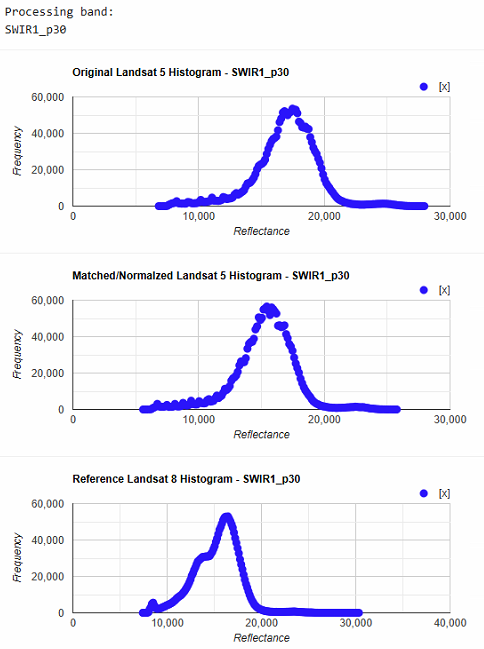** | **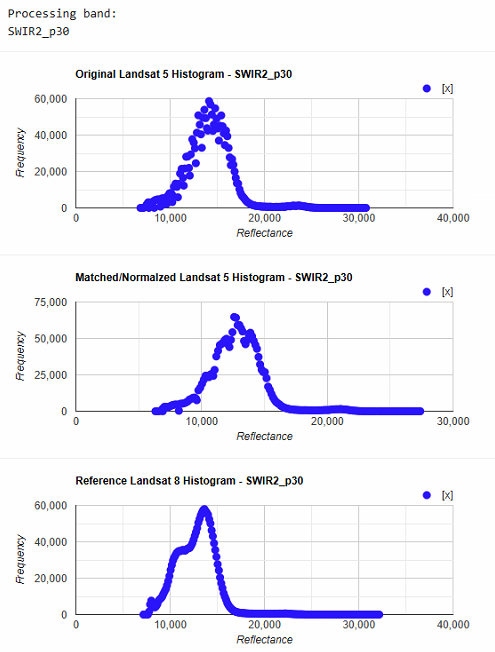** |

| **2005** | | |
| --- | --- | --- |
| **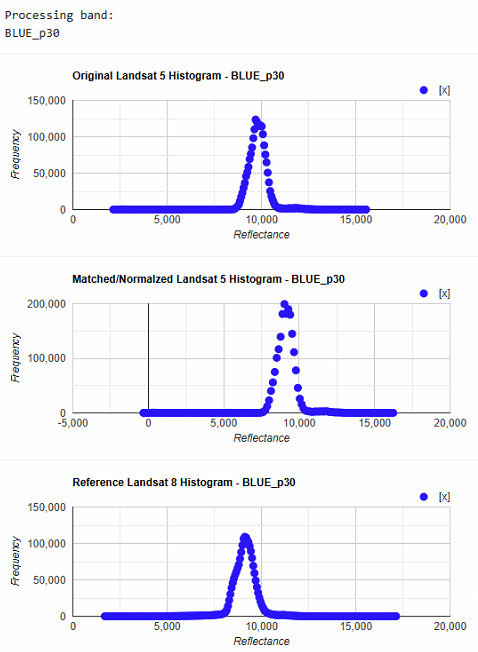** | **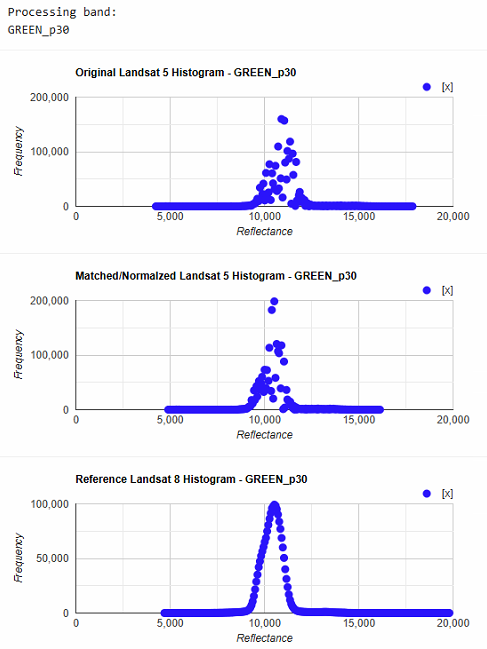** | **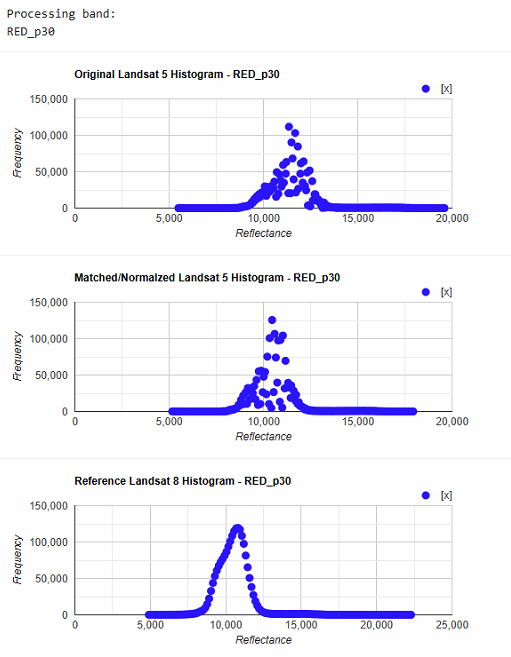** |
| **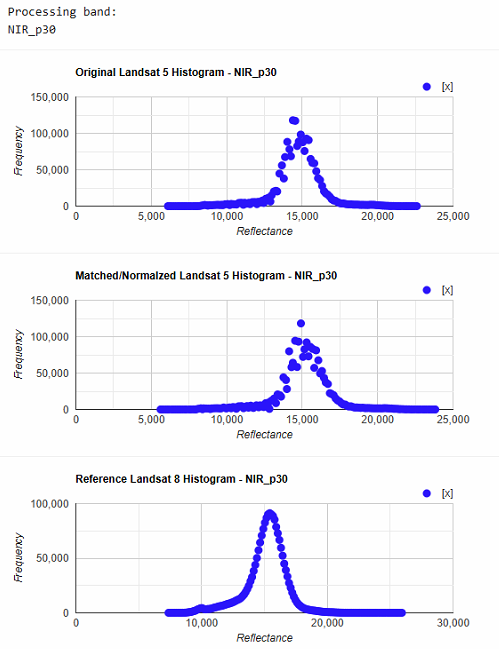** | **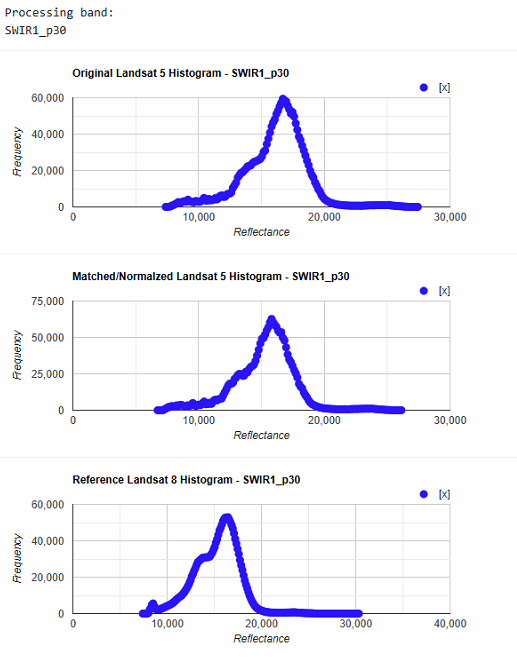** | **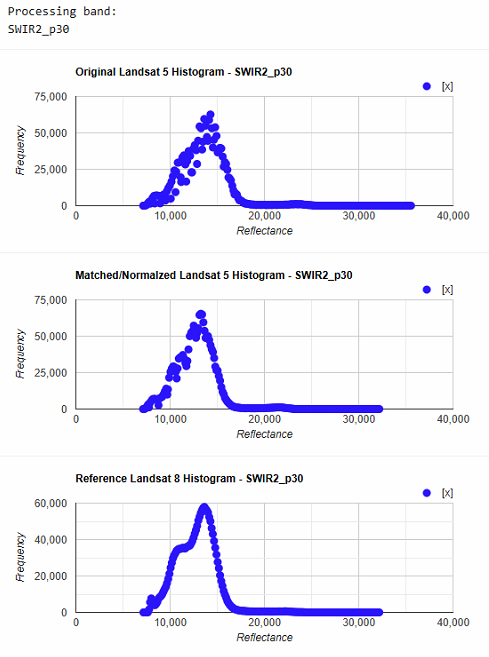** |

| **2010** | | |
| --- | --- | --- |
| **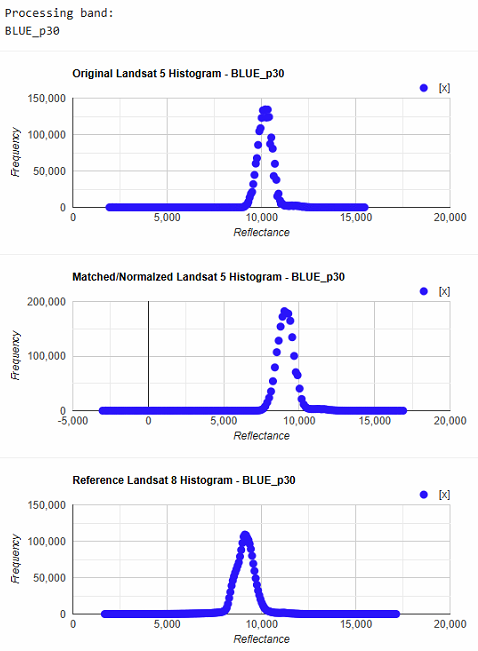** | **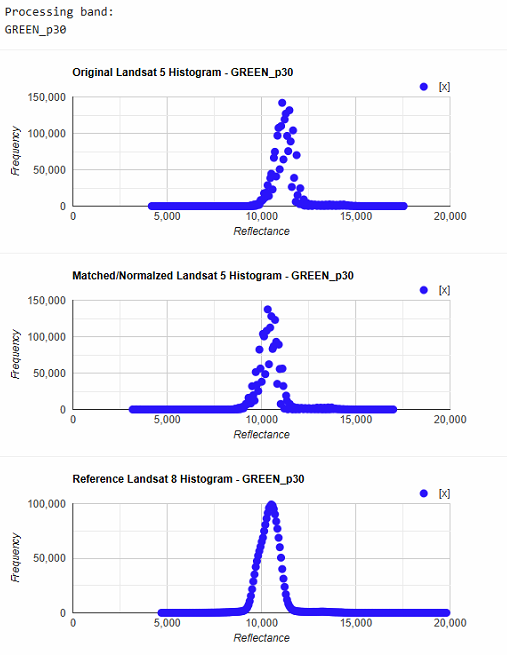** | **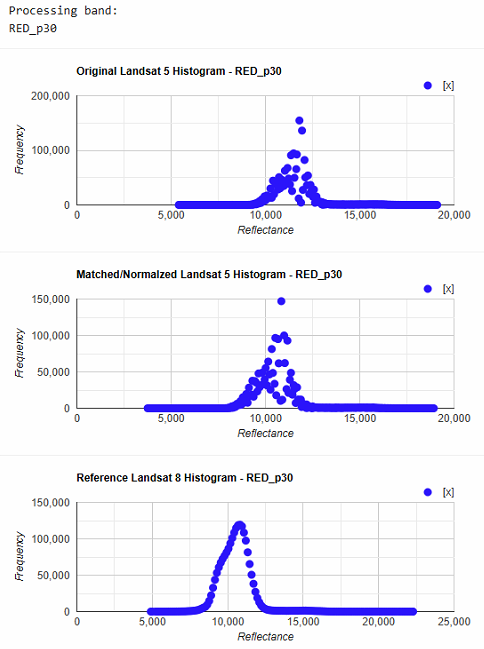** |
| **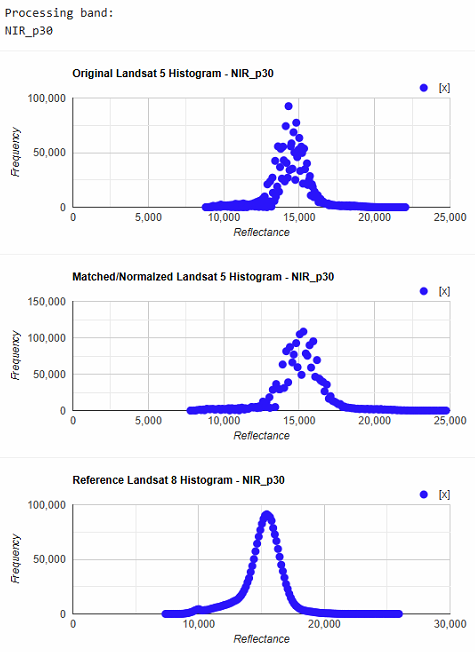** | **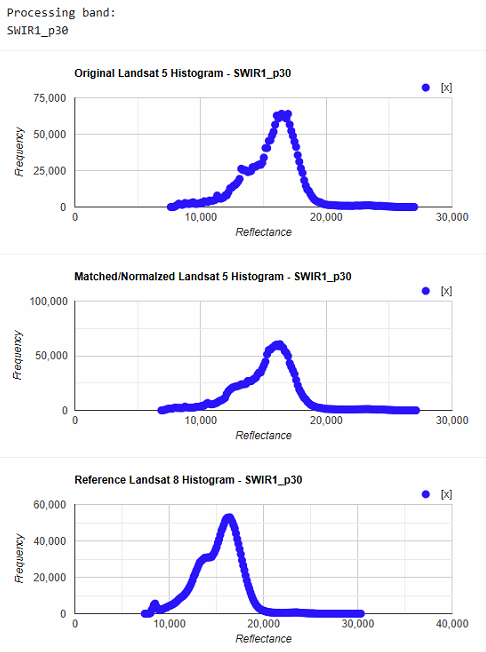** | **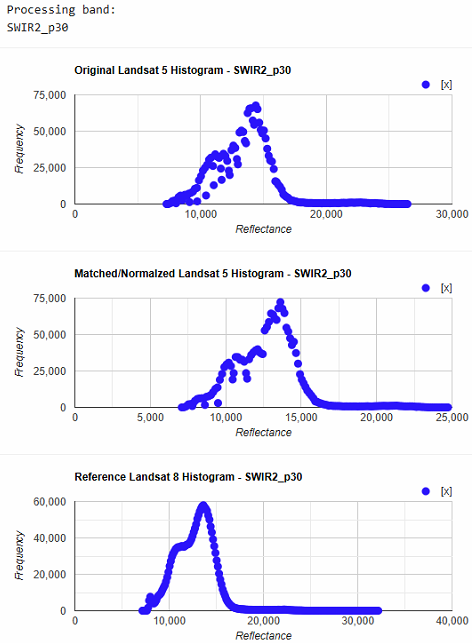** |

**Supplementary 6: 100 Iteration average results of individual machine learning and regression models under varying model specifications**

1. Testing a variety of linear and non-linear machine learning and regression models

| **EC** | Continuous |  |
| --- | --- | --- |
| **Variables** | All |  |
| **Train-Test** | 70-30 |  |
| **Row Labels** | **Average of R2_Train** | **Average of R2_Test** |
| Bagging | 0.883958695 | 0.390130017 |
| RandomForest | 0.886629656 | 0.38153062 |
| Quadratic_correlated | 0.493063218 | 0.075613038 |
| Stepwise | 0.667250327 | -0.4812077 |
| OLS | 0.684766378 | -0.881249685 |
| ANN | 0.899084686 | -1.589536008 |
| Quadratic_all | 0.883570262 | -66.78533693 |
| Log-Linear | 0.480977049 | -9.34509E+19 |

| **EC** | Continuous |  |
| --- | --- | --- |
| **Variables** | All |  |
| **Train-Test** | 70-30 |  |
| Random Forest maxnodes = 6 (reduced depth to avoid overfitting in small dataset) | | |
| **Row Labels** | **Average of R2_Train** | **Average of R2_Test** |
| Bagging | 0.740572046 | 0.40654547 |
| RandomForest | 0.761469885 | 0.402998112 |
| Quadratic_correlated | 0.485572096 | 0.075818915 |
| Stepwise | 0.65584359 | -0.519069914 |
| OLS | 0.674089184 | -0.821922951 |
| ANN | 0.889559236 | -4.73293199 |
| Quadratic_all | 0.875804963 | -69.9171603 |
| Log-Linear | 0.465514807 | -2.5877E+14 |

| **EC** | Continuous |  |
| --- | --- | --- |
| **Variables** | Pure bands and highly correlated | |
| **Train-Test** | 80-20 |  |
| **Parameter adjustments for small data (maxnodes = 6)** | |  |
| **Row Labels** | **Average of R2_Train** | **Average of R2_Test** |
| RandomForest | 0.729574484 | 0.444587276 |
| Bagging | 0.745901662 | 0.432524444 |
| Lasso | 0.385876678 | 0.301727259 |
| Ridge | 0.336485852 | 0.273195735 |
| OLS | 0.519148023 | 0.270856197 |
| Quadratic_correlated | 0.546587506 | 0.247986491 |
| Stepwise | 0.504797542 | 0.235174696 |
| Quadratic_all | 0.606914335 | -0.234295277 |
| Log-Linear | -0.113285846 | -6.731768748 |
| ANN | -6.586192881 | -179.2320997 |

| **EC** | Continuous |  |
| --- | --- | --- |
| **Variables** | PCA (3) |  |
| **Train-Test** | 80-20 (random) |  |
| **Row Labels** | **Average of R2_Train** | **Average of R2_Test** |
| Bagging | 0.454671094 | 0.191897586 |
| Ridge | 0.271008882 | 0.167371934 |
| Quantile Regression | 0.294190471 | 0.156754325 |
| OLS | 0.339315496 | 0.151301889 |
| Lasso | 0.336095118 | 0.145802083 |
| Log-Linear | 0.226656671 | 0.145261048 |
| RandomForest | 0.362814088 | 0.140630829 |
| Stepwise | 0.332848696 | 0.127901676 |
| ANN | -5.770963851 | -30.57203946 |
|  |  |  |

1. Testing variable selection with random sampling

| **EC** | Binary |  |
| --- | --- | --- |
| **Variables** | All |  |
| **Train-Test** | 80-20 (random) |  |
| **Row Labels** | **Average of Accuracy_Train** | **Average of Accuracy_Test** |
| Random Forest | 0.992857143 | 0.847272727 |
| ANN | 0.954166667 | 0.787272727 |
| Logistic | 0.956785714 | 0.762727273 |

| **EC** | Binary |  |
| --- | --- | --- |
| **Variables** | Lasso |  |
| **Train-Test** | 80-20 (random) |  |
| **Row Labels** | **Average of Accuracy_Train** | **Average of Accuracy_Test** |
| Logistic | 0.889166667 | 0.848181818 |
| Random Forest | 0.992857143 | 0.841363636 |
| ANN | 0.960595238 | 0.789090909 |

| EC | Binary |  | |
| --- | --- | --- | --- |
| **Variables** | Pure bands and highly correlated | |
| **Train-Test** | 80-20 (random) |  |
| **Row Labels** | **Average of Accuracy_Train** | **Average of Accuracy_Test** |
| Random Forest | 0.992857143 | 0.838181818 |
| Logistic | 0.901071429 | 0.833181818 |
| ANN | 0.96 | 0.775909091 |

| **EC** | Categorical |  |
| --- | --- | --- |
| **Variables** | All |  |
| **Train-Test** | 80-20 (random) |  |
| **Row Labels** | **Average of Accuracy_Train** | **Average of Accuracy_Test** |
| Random Forest | 0.995364489 | 0.76482743 |
| ANN | 0.899229683 | 0.671691396 |

| **EC** | Categorical |  |
| --- | --- | --- |
| **Variables** | Pure bands and highly correlated | |
| **Train-Test** | 80-20 (random) |  |
| **Row Labels** | **Average of Accuracy_Train** | **Average of Accuracy_Test** |
| Random Forest | 0.995541963 | 0.74184358 |
| ANN | 0.886974731 | 0.667993751 |

| **EC** | Categorical |  |
| --- | --- | --- |
| **Variables** | Lasso variables |  |
| **Train-Test** | 80-20 (random) |  |
| **Row Labels** | **Average of Accuracy_Train** | **Average of Accuracy_Test** |
| Random Forest | 0.947499565 | 0.730831604 |
| ANN | 0.780972881 | 0.709749143 |

1. Testing Variable selection with stratified sampling

| **EC** | Binary |  |
| --- | --- | --- |
| **Variables** | All |  |
| **Train-Test** | 80-20 (stratified) |  |
| **Row Labels** | **Average of Accuracy_Train** | **Average of Accuracy_Test** |
| Random Forest | 0.992352941 | 0.844285714 |
| ANN | 0.954705882 | 0.798571429 |
| Logistic | 0.947294118 | 0.754761905 |

| **EC** | Binary |  |
| --- | --- | --- |
| **Variables** | Lasso |  |
| **Train-Test** | 80-20 (stratified) |  |
| **Row Labels** | **Average of Accuracy_Train** | **Average of Accuracy_Test** |
| Logistic | 0.890470588 | 0.843809524 |
| Random Forest | 0.992352941 | 0.834761905 |
| ANN | 0.956352941 | 0.810952381 |

| **EC** | Binary |  | |
| --- | --- | --- | --- |
| **Variables** | Pure bands and highly correlated | |
| **Train-Test** | 80-20 (stratified) |  |
| **Row Labels** | **Average of Accuracy_Train** | **Average of Accuracy_Test** |
| Logistic | 0.900941176 | 0.830952381 |
| Random Forest | 0.992352941 | 0.826190476 |
| ANN | 0.960117647 | 0.798095238 |

| **EC** | Categorical |  |
| --- | --- | --- |
| **Variables** | All |  |
| **Train-Test** | 80-20 (stratified) |  |
| **Row Labels** | **Average of Accuracy_Train** | **Average of Accuracy_Test** |
| Random Forest | 0.99173913 | 0.78800641 |
| ANN | 0.900927668 | 0.686840798 |

| **EC** | Categorical |  |
| --- | --- | --- |
| **Variables** | Pure bands and highly correlated | |
| **Train-Test** | 80-20 (stratified) |  |
| **Row Labels** | **Average of Accuracy_Train** | **Average of Accuracy_Test** |
| Random Forest | 0.992463768 | 0.76102381 |
| ANN | 0.881891211 | 0.710176005 |

| **EC** | Categorical |  |
| --- | --- | --- |
| **Variables** | Lasso variables |  |
| **Train-Test** | 80-20 (stratified) |  |
| **Row Labels** | **Average of Accuracy_Train** | **Average of Accuracy_Test** |
| Random Forest | 0.931594203 | 0.752554487 |
| ANN | 0.781774522 | 0.707827381 |

**Supplementary 7: Threshold Test Results**

The sensitivity of the final ensemble model to threshold values for converting predicted probabilities to binary values was tested. 81 possible threshold values were tested ranging from 0.1 to 0.9 at 0.01 increments. In each iteration, the threshold was used to convert predicted probabilities to binary values and compute accuracy for the training set and the internal testing set. Mean accuracy for the training set was 0.91 (±0.025) and mean accuracy for the testing set was 0.82 (±0.056). Differences between the training and testing sets were low for all threshold values, with a mean value of 0.090 (±0.045). These results suggest low possibility of overfitting and relatively low sensitivity of model performance to changing threshold values.

| **Table 1:** Accuracy results for different threshold values. | | | |
| --- | --- | --- | --- |
| **Threshold** | **Train accuracy** | **Test accuracy** | **Difference in accuracy** |
| 0.1 | 0.80 | 0.67 | 0.13 |
| 0.11 | 0.81 | 0.67 | 0.15 |
| 0.12 | 0.84 | 0.67 | 0.17 |
| 0.13 | 0.85 | 0.67 | 0.18 |
| 0.14 | 0.86 | 0.67 | 0.19 |
| 0.15 | 0.86 | 0.67 | 0.19 |
| 0.16 | 0.87 | 0.67 | 0.20 |
| 0.17 | 0.87 | 0.71 | 0.16 |
| 0.18 | 0.87 | 0.76 | 0.11 |
| 0.19 | 0.89 | 0.76 | 0.13 |
| 0.2 | 0.89 | 0.76 | 0.13 |
| 0.21 | 0.89 | 0.81 | 0.08 |
| 0.22 | 0.91 | 0.81 | 0.10 |
| 0.23 | 0.91 | 0.86 | 0.05 |
| 0.24 | 0.91 | 0.86 | 0.05 |
| 0.25 | 0.91 | 0.86 | 0.05 |
| 0.26 | 0.91 | 0.86 | 0.05 |
| 0.27 | 0.91 | 0.86 | 0.05 |
| 0.28 | 0.91 | 0.86 | 0.05 |
| 0.29 | 0.91 | 0.86 | 0.05 |
| 0.3 | 0.92 | 0.86 | 0.06 |
| 0.31 | 0.93 | 0.81 | 0.12 |
| 0.32 | 0.93 | 0.81 | 0.12 |
| 0.33 | 0.93 | 0.81 | 0.12 |
| 0.34 | 0.93 | 0.81 | 0.12 |
| 0.35 | 0.93 | 0.81 | 0.12 |
| 0.36 | 0.93 | 0.81 | 0.12 |
| 0.37 | 0.93 | 0.81 | 0.12 |
| 0.38 | 0.93 | 0.76 | 0.17 |
| 0.39 | 0.93 | 0.76 | 0.17 |
| 0.4 | 0.93 | 0.76 | 0.17 |
| 0.41 | 0.93 | 0.81 | 0.12 |
| 0.42 | 0.93 | 0.81 | 0.12 |
| 0.43 | 0.93 | 0.81 | 0.12 |
| 0.44 | 0.93 | 0.81 | 0.12 |
| 0.45 | 0.93 | 0.81 | 0.12 |
| 0.46 | 0.93 | 0.81 | 0.12 |
| 0.47 | 0.93 | 0.81 | 0.12 |
| 0.48 | 0.93 | 0.81 | 0.12 |
| 0.49 | 0.93 | 0.81 | 0.12 |
| 0.5 | 0.93 | 0.81 | 0.12 |
| 0.51 | 0.92 | 0.81 | 0.11 |
| 0.52 | 0.92 | 0.81 | 0.11 |
| 0.53 | 0.92 | 0.81 | 0.11 |
| 0.54 | 0.92 | 0.81 | 0.11 |
| 0.55 | 0.91 | 0.81 | 0.10 |
| 0.56 | 0.91 | 0.81 | 0.10 |
| 0.57 | 0.92 | 0.81 | 0.11 |
| 0.58 | 0.92 | 0.86 | 0.06 |
| 0.59 | 0.92 | 0.86 | 0.06 |
| 0.6 | 0.92 | 0.86 | 0.06 |
| 0.61 | 0.92 | 0.86 | 0.06 |
| 0.62 | 0.92 | 0.86 | 0.06 |
| 0.63 | 0.92 | 0.86 | 0.06 |
| 0.64 | 0.92 | 0.86 | 0.06 |
| 0.65 | 0.92 | 0.86 | 0.06 |
| 0.66 | 0.91 | 0.86 | 0.05 |
| 0.67 | 0.91 | 0.86 | 0.05 |
| 0.68 | 0.91 | 0.86 | 0.05 |
| 0.69 | 0.91 | 0.86 | 0.05 |
| 0.7 | 0.91 | 0.86 | 0.05 |
| 0.71 | 0.91 | 0.86 | 0.05 |
| 0.72 | 0.91 | 0.86 | 0.05 |
| 0.73 | 0.91 | 0.86 | 0.05 |
| 0.74 | 0.91 | 0.86 | 0.05 |
| 0.75 | 0.91 | 0.86 | 0.05 |
| 0.76 | 0.91 | 0.86 | 0.05 |
| 0.77 | 0.91 | 0.86 | 0.05 |
| 0.78 | 0.91 | 0.86 | 0.05 |
| 0.79 | 0.91 | 0.86 | 0.05 |
| 0.8 | 0.91 | 0.86 | 0.05 |
| 0.81 | 0.91 | 0.86 | 0.05 |
| 0.82 | 0.91 | 0.86 | 0.05 |
| 0.83 | 0.91 | 0.86 | 0.05 |
| 0.84 | 0.91 | 0.86 | 0.05 |
| 0.85 | 0.91 | 0.86 | 0.05 |
| 0.86 | 0.91 | 0.86 | 0.05 |
| 0.87 | 0.91 | 0.86 | 0.05 |
| 0.88 | 0.91 | 0.86 | 0.05 |
| 0.89 | 0.88 | 0.86 | 0.03 |
| 0.9 | 0.88 | 0.86 | 0.03 |

**Supplementary 8: Relationship between predictor variables and Electrical Conductivity and Soil Moisture**

| **Relationship of predictor with EC** | **Relationship of predictor with soil moisture** |
| --- | --- |
| Normalized Difference Water Index (NDWI)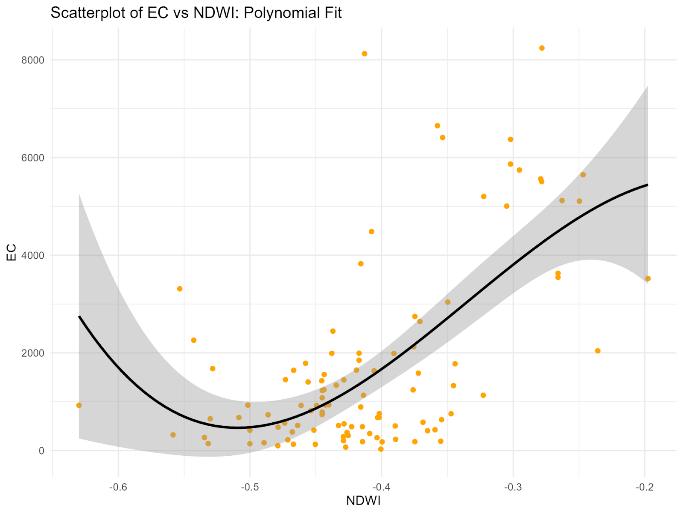 | 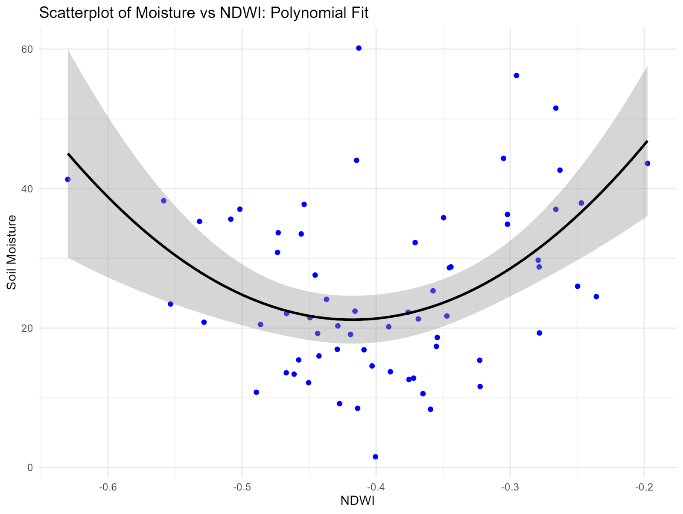 |
| Normalized Blue and NIR (NBNIR)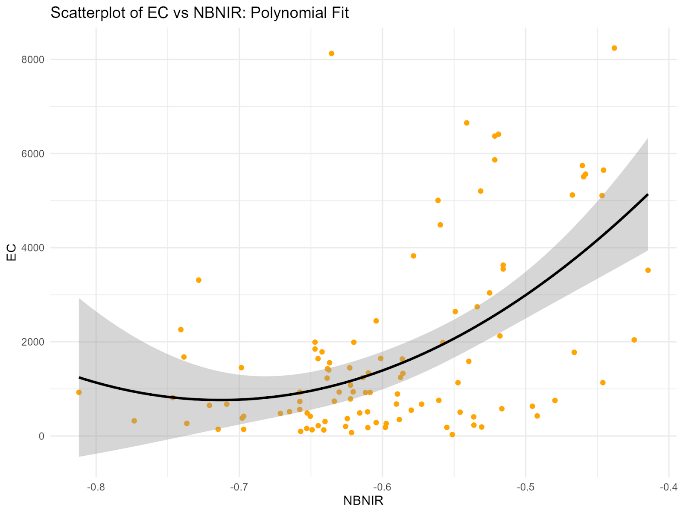 | 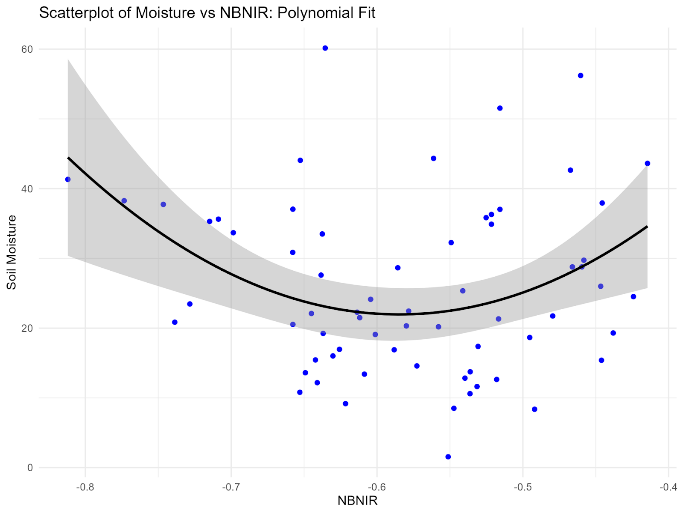 |
| SWIR2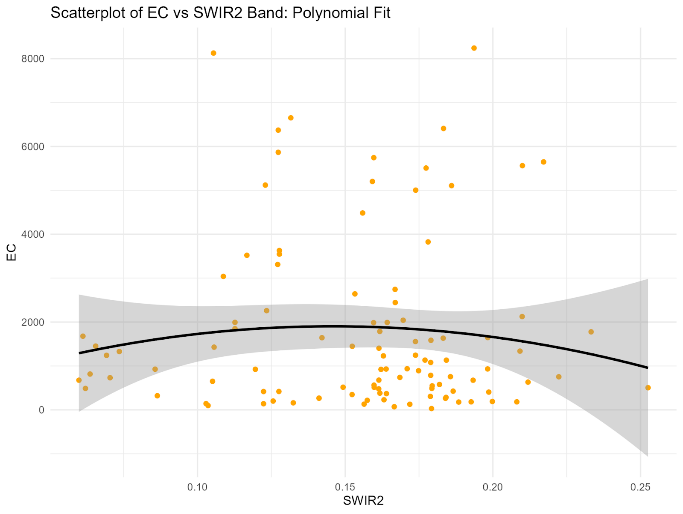 | 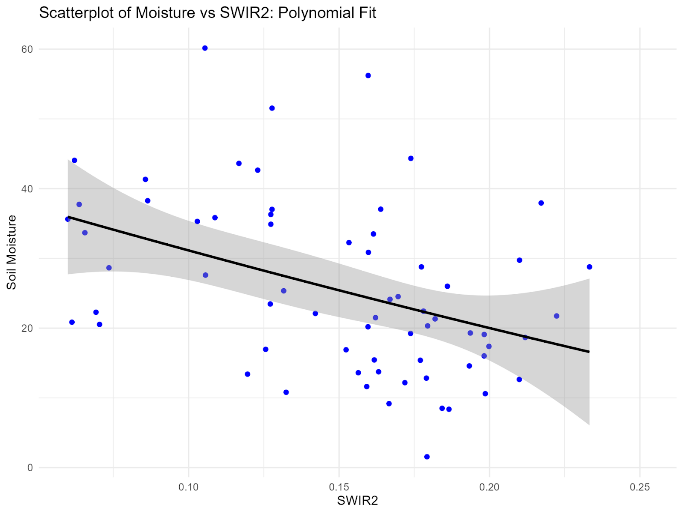 |
| Green  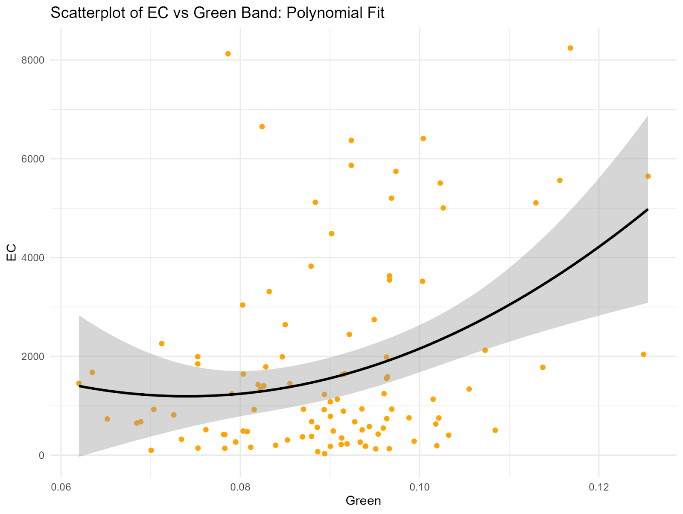 | 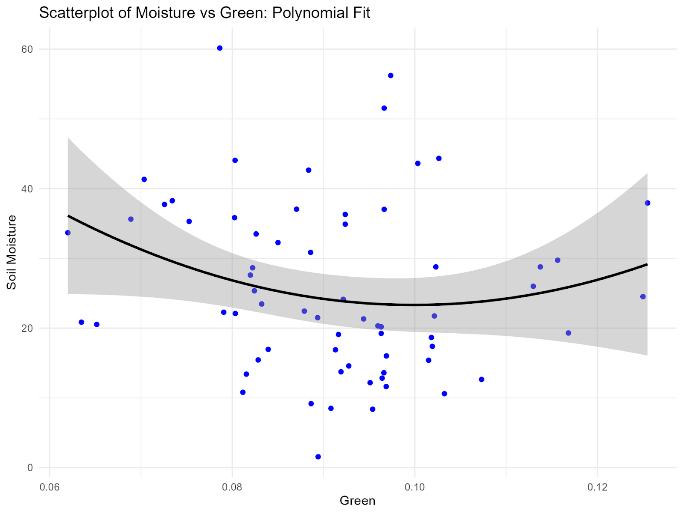 |
| Normalized Red and SWIR1 (NRSWIR1)  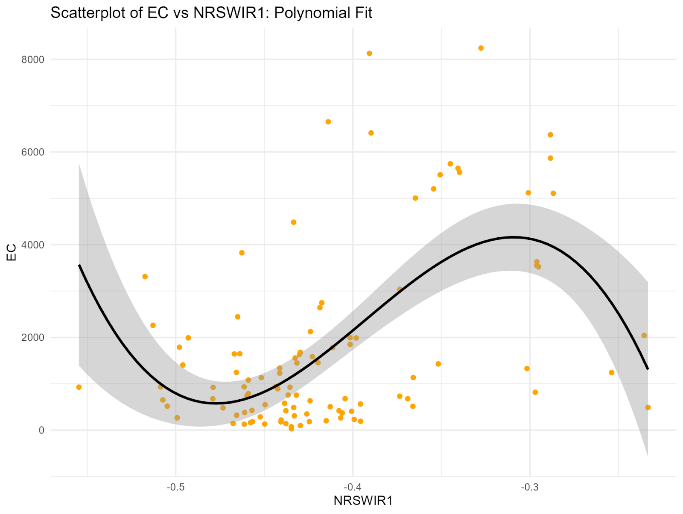 | 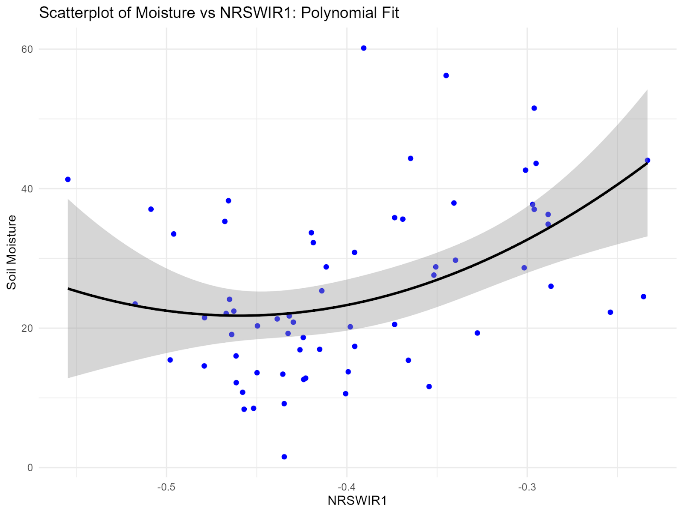 |
| Vegetation Soil Salinity Index (VSSI)  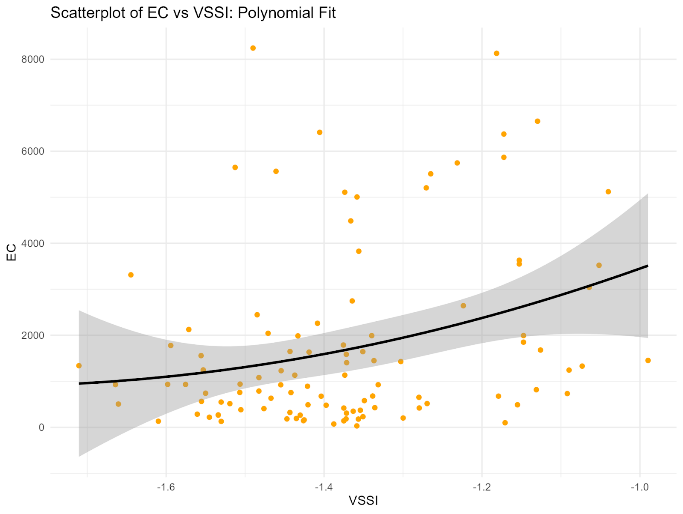 | 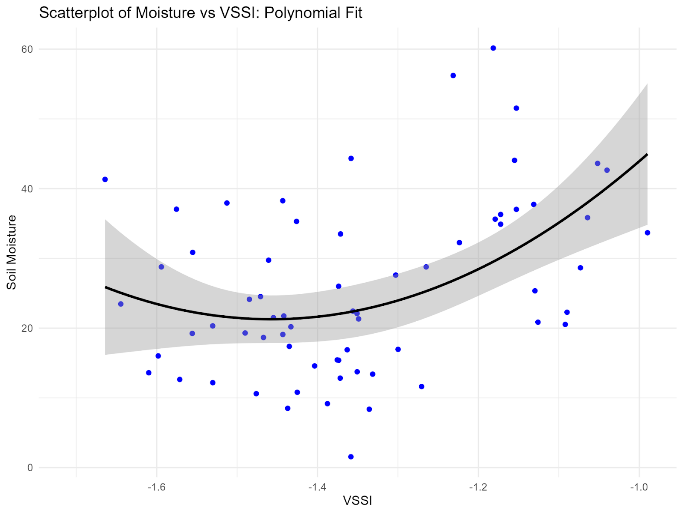 |
| Normalized NIR and SWIR1 (NNIRSWIR1)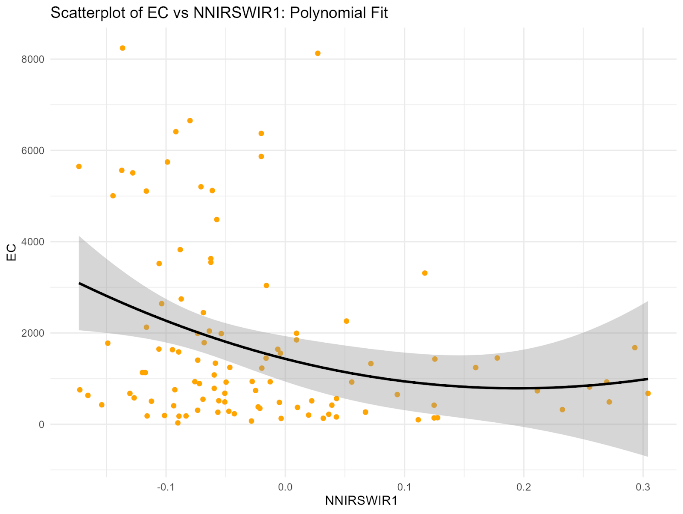 | 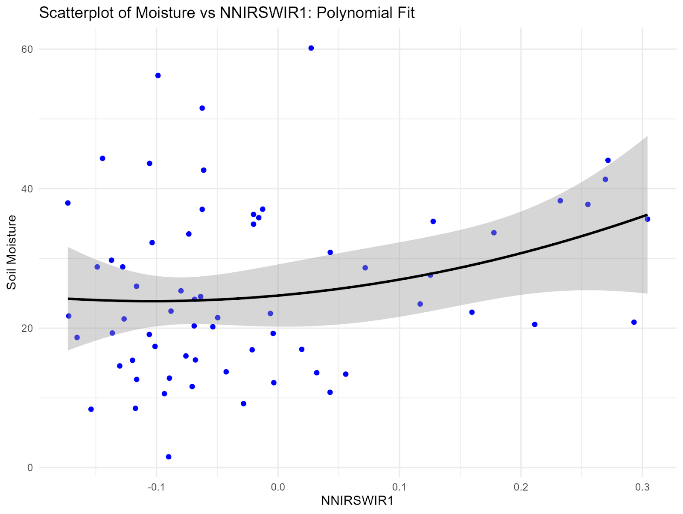 |
| Normalized Difference Salinity Index (NDSI1)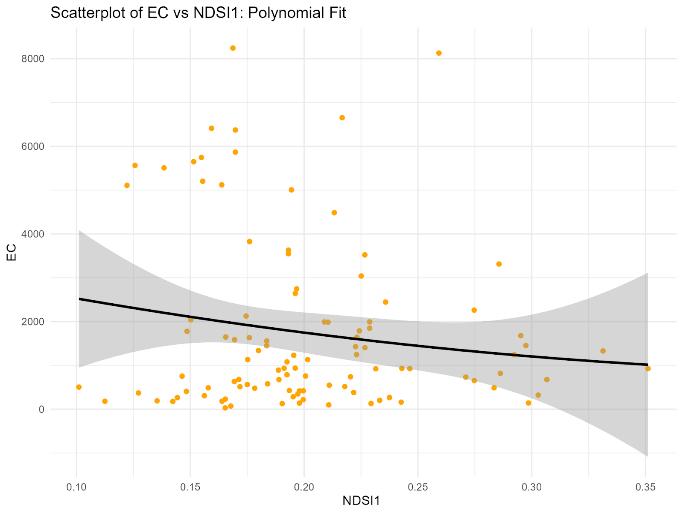 | 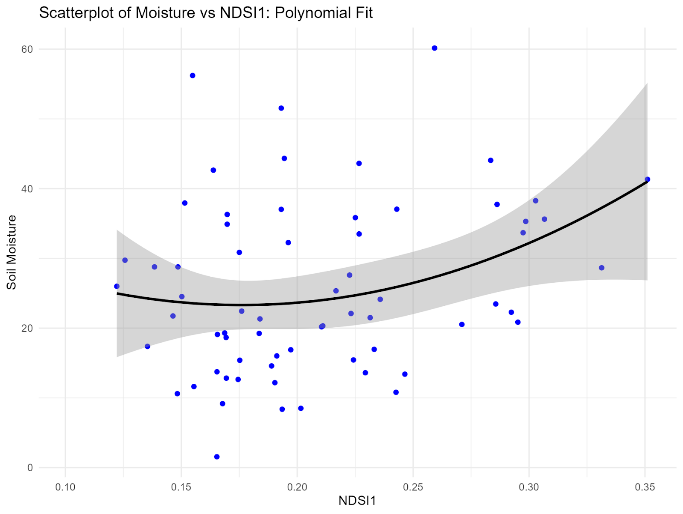 |
| Normalized Green and SWIR1 (NGSWIR1)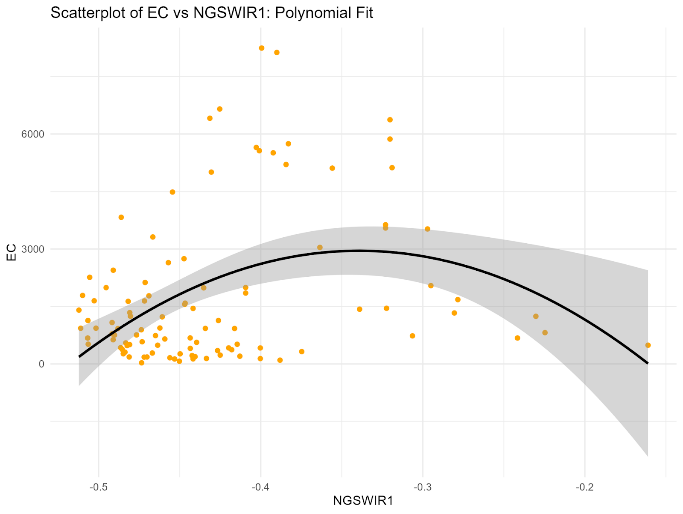 | 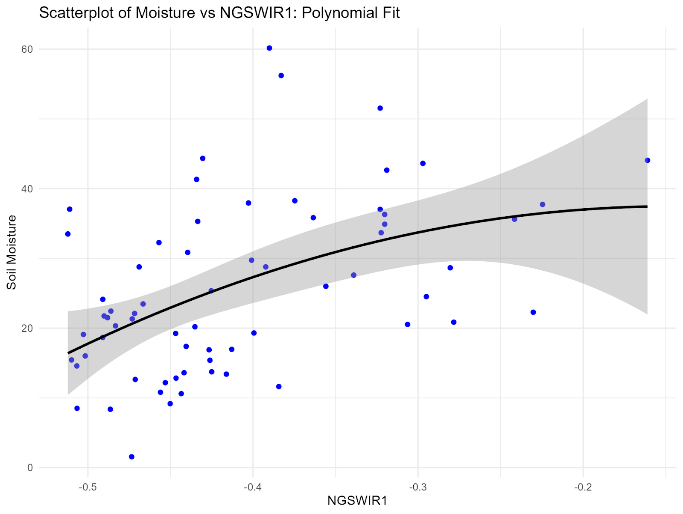 |
| Normalized Blue and SWIR2 (NBSWIR2)  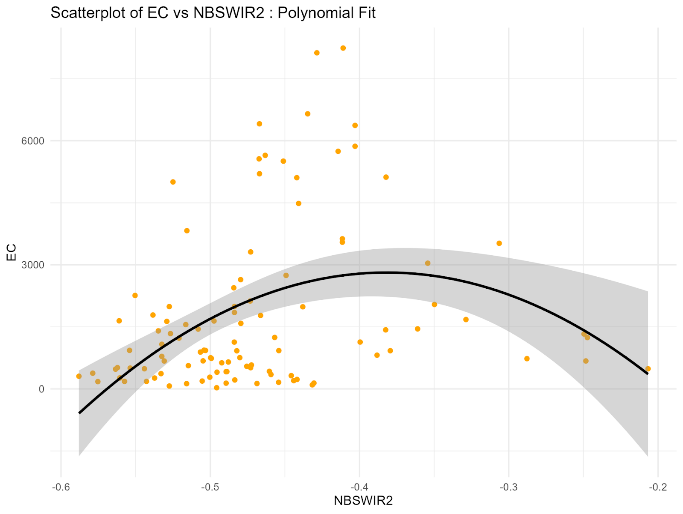 | 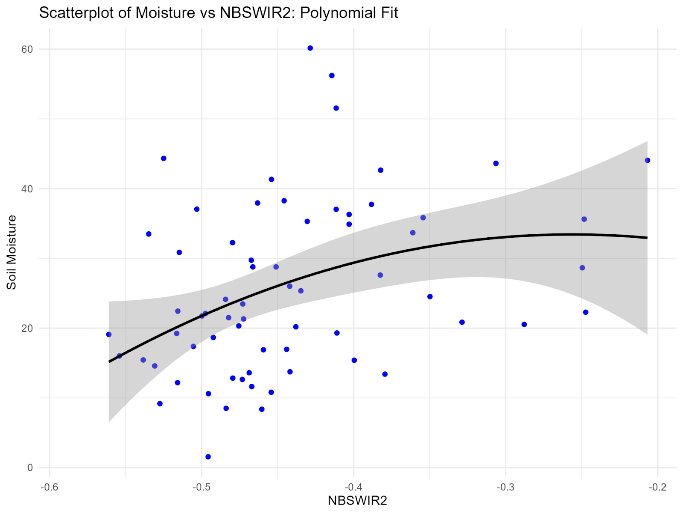 |
| Relationships between indices featuring highest in CoSal-SA model with EC and moisture. NDWI, NBNIR and VSSI increase for higher levels of EC as well as moisture. | |

**Supplementary 9: Accuracies of Training and Testing Sets**

| **Table 1:** Model ensemble methods, sampling strategies, and corresponding accuracy metrics for the training set and testing sets (one internal and one external). | | | |
| --- | --- | --- | --- |
|  | **Final Model** | Model 1 | Model 2 |
| **Ensemble method** | **RF** | RF | glm |
| **Sampling** | **Cross validation with k-fold (5)** | Bootstrap 0.632 (with replacement) | Cross validation with k-fold (5) |
|  |  |  |  |
| **Training** |  |  |  |
| Accuracy | 0.92 | 0.91 | 0.82 |
| Precision | 1 | 0.86 | 0.65 |
| Recall | 0.71 | 0.79 | 0.79 |
| F1-Score | 0.83 | 0.83 | 0.72 |
|  |  |  |  |
| **Testing (Internal)** |  |  |  |
| Accuracy | 0.86 | 0.81 | 0.76 |
| Precision | 0.8 | 0.6 | 0.55 |
| Recall | 0.67 | 1 | 1 |
| F1-Score | 0.73 | 0.75 | 0.71 |
|  |  |  |  |
| **Testing (External)** |  |  |  |
| Accuracy | 0.69 | - | - |
| Precision | 0.71 | - | - |
| Recall | 0.82 | - | - |
| F1-Score | 0.76 | - | - |
